# Supplementary material
Source: Royal Society of Chemistry journal article supplement (doi:10.1039/d6ce00301j)
Supplement: d6ce00301j1.pdf [file d6ce00301j1.pdf]

# **Investigation of Structural, Thermal and High-temperature Piezoelectric Properties of $\text{Ca}_3\text{Ta}(\text{Ga}_{1-x}\text{Al}_x)_3\text{Si}_2\text{O}_{14}$ Crystals Grown by Vertical Bridgman Method**

Liping Shang<sup>1</sup>, Chengkai Ren<sup>1</sup>, Qiang Zhou<sup>1</sup>, Zhigang Sun<sup>1</sup>, Linwen Jiang<sup>1</sup>, Cheng Ji<sup>2,\*</sup>, Shuai Wang<sup>1,\*</sup>, Yanqing Zheng<sup>1</sup>

1. School of Materials Science and Chemical Engineering, Ningbo University, Ningbo, Zhejiang 315211, P. R. China.

2. Functional Materials Engineering Research Center, School of Engineering, Hangzhou City University, Hangzhou, Zhejiang 310015, P. R. China.

\*Corresponding author.

**E-mail addresses:** wangshuai@nbu.edu.cn, 2326746jiji@sina.com

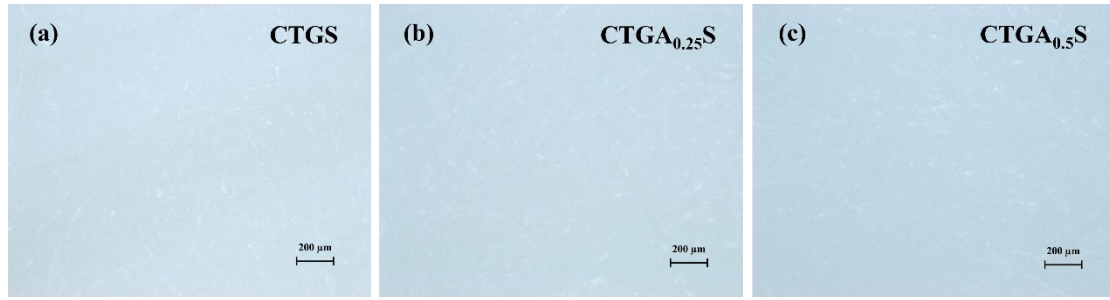

**Figure S1** The optical microscopy images of the wafers of (a) CTGS, (b) CTGA<sub>0.25</sub>S, and (c) CTGA<sub>0.5</sub>S

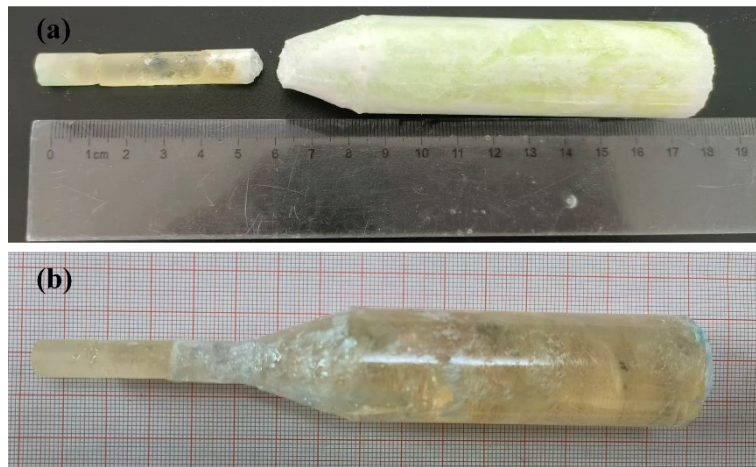

**Figure S2** (a) Polycrystalline crystal obtained at a lower seeding temperature, (b) cracked crystal formed under a faster cooling rate.
